# Supplementary material
Source: MDPI journal article supplement (https://www.mdpi.com/1424-2818/15/9/975)
Supplement: s1 [file s1]

Table S1. Percent similarity of strains assigned to *Leptolyngbya* and *Plectolyngbya*, with sister taxa *Tapinothrix*, *Romeria*, and a *Leptolyngbya* species outside of *Leptolyngbya sensu stricto*. Values <94.5 generally indicate different genera, while values <98.7 are typically considered different species. The three clades in *Leptolyngbya sensu stricto* identified as nodes in the phylogenetic analysis are indicated by different colored shading.

|                                            | <i>Romeria</i> sp LEGE 06013 | <i>Tapinothrix clintonii</i> GSE-PSE06-07G | <i>Plectolyngbya terrestris</i> FBCC-A1479 | <i>Plectolyngbya salina</i> FBCC-A1477 | <i>Plectolyngbya koreana</i> FBCC-A1478 | <i>Plectolyngbya</i> sp. ZNP2-VF1 | <i>Plectolyngbya</i> sp. WJT66-NPBG17 | <i>Plectolyngbya hodgsonii</i> ANT.LPR2.2 | <i>Leptolyngbya tildenae</i> YNP77-MA3 | <i>Leptolyngbya vaporiphila</i> YNP69B-MA2 | <i>Leptolyngbya</i> sp. WS3-2-JRJ1 | <i>Leptolyngbya</i> sp. SEV4-3-c2 | <i>Leptolyngbya</i> sp. SEV5-1-c5 | <i>Leptolyngbya</i> sp SEV5-3-c28 | <i>Leptolyngbya</i> sp. WS5-3-AS8 | <i>Leptolyngbya angustata</i> UTCC473 | <i>Leptolyngbya corticola</i> EF429299 | <i>Leptolyngbya tenerrima</i> UTCC77 | <i>Leptolyngbya boryana</i> PCC 6306 |  |
|--------------------------------------------|------------------------------|--------------------------------------------|--------------------------------------------|----------------------------------------|-----------------------------------------|-----------------------------------|---------------------------------------|-------------------------------------------|----------------------------------------|--------------------------------------------|------------------------------------|-----------------------------------|-----------------------------------|-----------------------------------|-----------------------------------|---------------------------------------|----------------------------------------|--------------------------------------|--------------------------------------|--|
| <i>Leptolyngbya boryana</i> PCC 6306       |                              |                                            |                                            |                                        |                                         |                                   |                                       |                                           |                                        |                                            |                                    |                                   |                                   |                                   |                                   |                                       |                                        |                                      |                                      |  |
| <i>Leptolyngbya tenerrima</i> UTCC77       |                              |                                            |                                            |                                        |                                         |                                   |                                       |                                           |                                        |                                            |                                    |                                   |                                   |                                   |                                   |                                       |                                        | 99.6                                 |                                      |  |
| <i>Leptolyngbya corticola</i> EF429299     |                              |                                            |                                            |                                        |                                         |                                   |                                       |                                           |                                        |                                            |                                    |                                   |                                   |                                   |                                   |                                       |                                        | 99.1                                 |                                      |  |
| <i>Leptolyngbya angustata</i> UTCC473      |                              |                                            |                                            |                                        |                                         |                                   |                                       |                                           |                                        |                                            |                                    |                                   |                                   |                                   |                                   |                                       |                                        | 99.5                                 | 99.5                                 |  |
| <i>Leptolyngbya</i> sp. WS5-3-AS8          |                              |                                            |                                            |                                        |                                         |                                   |                                       |                                           |                                        |                                            |                                    |                                   |                                   |                                   |                                   |                                       |                                        | 96.4                                 | 96.5                                 |  |
| <i>Leptolyngbya</i> sp SEV5-3-c28          |                              |                                            |                                            |                                        |                                         |                                   |                                       |                                           |                                        |                                            |                                    |                                   |                                   |                                   |                                   |                                       |                                        | 94.9                                 | 95.0                                 |  |
| <i>Leptolyngbya</i> sp. SEV5-1-c5          |                              |                                            |                                            |                                        |                                         |                                   |                                       |                                           |                                        |                                            |                                    |                                   |                                   |                                   |                                   |                                       |                                        | 95.4                                 | 95.5                                 |  |
| <i>Leptolyngbya</i> sp. SEV4-3-c2          |                              |                                            |                                            |                                        |                                         |                                   |                                       |                                           |                                        |                                            |                                    |                                   |                                   |                                   |                                   |                                       |                                        | 96.4                                 | 96.5                                 |  |
| <i>Leptolyngbya</i> sp. WS3-2-JRJ1         |                              |                                            |                                            |                                        |                                         |                                   |                                       |                                           |                                        |                                            |                                    |                                   |                                   |                                   |                                   |                                       |                                        | 96.8                                 | 96.9                                 |  |
| <i>Leptolyngbya vaporiphila</i> YNP69B-MA2 |                              |                                            |                                            |                                        |                                         |                                   |                                       |                                           |                                        |                                            |                                    |                                   |                                   |                                   |                                   |                                       |                                        | 96.2                                 | 96.3                                 |  |
| <i>Leptolyngbya tildenae</i> YNP77-MA3     |                              |                                            |                                            |                                        |                                         |                                   |                                       |                                           |                                        |                                            |                                    |                                   |                                   |                                   |                                   |                                       |                                        | 95.7                                 | 95.8                                 |  |
| <i>Plectolyngbya hodgsonii</i> ANT.LPR2.2  |                              |                                            |                                            |                                        |                                         |                                   |                                       |                                           |                                        |                                            |                                    |                                   |                                   |                                   |                                   |                                       |                                        | 95.3                                 | 95.4                                 |  |
| <i>Plectolyngbya</i> sp. WJT66-NPBG17      |                              |                                            |                                            |                                        |                                         |                                   |                                       |                                           |                                        |                                            |                                    |                                   |                                   |                                   |                                   |                                       |                                        | 95.8                                 | 95.9                                 |  |
| <i>Plectolyngbya</i> sp. ZNP2-VF1          |                              |                                            |                                            |                                        |                                         |                                   |                                       |                                           |                                        |                                            |                                    |                                   |                                   |                                   |                                   |                                       |                                        | 95.9                                 | 96.0                                 |  |
| <i>Plectolyngbya koreana</i> FBCC-A1478    |                              |                                            |                                            |                                        |                                         |                                   |                                       |                                           |                                        |                                            |                                    |                                   |                                   |                                   |                                   |                                       |                                        | 96.1                                 | 96.2                                 |  |
| <i>Plectolyngbya salina</i> FBCC-A1477     |                              |                                            |                                            |                                        |                                         |                                   |                                       |                                           |                                        |                                            |                                    |                                   |                                   |                                   |                                   |                                       |                                        | 95.4                                 | 95.5                                 |  |
| <i>Plectolyngbya terrestris</i> FBCC-A1479 |                              |                                            |                                            |                                        |                                         |                                   |                                       |                                           |                                        |                                            |                                    |                                   |                                   |                                   |                                   |                                       |                                        | 96.2                                 | 96.3                                 |  |
| <i>Tapinothrix clintonii</i> GSE-PSE06-07G |                              |                                            |                                            |                                        |                                         |                                   |                                       |                                           |                                        |                                            |                                    |                                   |                                   |                                   |                                   |                                       |                                        | 93.4                                 | 93.5                                 |  |
| <i>Romeria</i> sp LEGE 06013               |                              |                                            |                                            |                                        |                                         |                                   |                                       |                                           |                                        |                                            |                                    |                                   |                                   |                                   |                                   |                                       |                                        | 91.9                                 | 92.0                                 |  |
| <i>Leptolyngbya</i> sp. HA4303-MV7         |                              |                                            |                                            |                                        |                                         |                                   |                                       |                                           |                                        |                                            |                                    |                                   |                                   |                                   |                                   |                                       |                                        | 91.2                                 | 91.3                                 |  |
