# Supplementary material
Source: MDPI journal article supplement (https://www.mdpi.com/1424-2818/15/9/975)
Supplement: s1 [file s1]

Table S2. Percent dissimilarity of the 16S-23S ITS region in strains assigned to *Leptolyngbya* and *Plectolyngbya*, with sister taxon *Tapinothrix*. Values >7.0 are considered strong evidence for recognition of separate species, while values <3.0 indicate same species. Strains considered to be the same species share colored shading. Note the discontinuity with *Tapinothrix clintonii*, which in all cases exceeded 25% dissimilarity with *Leptolyngbya*/*Plectolyngbya* sequences. Species described in this paper are in bold red font.

|                                        | <i>Leptolyngbya</i> sp. SEV4-3-6g | <i>Leptolyngbya</i> sp. SEV4-3-6c | <i>Leptolyngbya</i> sp. SEV5-3-c28 | <i>L. vaporiphila</i> YNP69B-MA2 | <i>Plectolyngbya</i> sp. HA4277-MV3 | <i>P. koreana</i> FBCC A1478 | <i>P. terrestris</i> FBCC A147 | <i>P. salina</i> FBCC A1477 | <i>P. hodgsonii</i> ANT.L52B.4 | <i>P. hodgsonii</i> ANT.LPR2.3 | <i>P. hodgsonii</i> ANT.LPR2 | <i>Leptolyngbya</i> sp. WJT66-NPBG17 | <i>Leptolyngbya tildenae</i> YNP77-MA3 | <i>Leptolyngbya</i> sp. WS3-2-JR1 | <i>L. boryana</i> BACA0330 | <i>L. boryana</i> PCC6306 | <i>Leptolyngbya</i> sp. PCC73110 | <i>Leptolyngbya</i> sp. CXA016.5 | <i>L. tenerrima</i> UTCC77 | <i>L. corticola</i> CCALA085 | <i>T. clintonii</i> GSE PSE06 |
|----------------------------------------|-----------------------------------|-----------------------------------|------------------------------------|----------------------------------|-------------------------------------|------------------------------|--------------------------------|-----------------------------|--------------------------------|--------------------------------|------------------------------|--------------------------------------|----------------------------------------|-----------------------------------|----------------------------|---------------------------|----------------------------------|----------------------------------|----------------------------|------------------------------|-------------------------------|
| <i>T. clintonii</i> GSE PSE06          |                                   |                                   |                                    |                                  |                                     |                              |                                |                             |                                |                                |                              |                                      |                                        |                                   |                            |                           |                                  |                                  |                            |                              |                               |
| <i>L. corticola</i> CCALA085           | 25.9                              |                                   |                                    |                                  |                                     |                              |                                |                             |                                |                                |                              |                                      |                                        |                                   |                            |                           |                                  |                                  |                            |                              |                               |
| <i>L. tenerrima</i> UTCC77             | 26.2                              | 6.0                               |                                    |                                  |                                     |                              |                                |                             |                                |                                |                              |                                      |                                        |                                   |                            |                           |                                  |                                  |                            |                              |                               |
| <i>Leptolyngbya</i> sp. CXA016.5       | 25.8                              | 5.2                               | 2.5                                |                                  |                                     |                              |                                |                             |                                |                                |                              |                                      |                                        |                                   |                            |                           |                                  |                                  |                            |                              |                               |
| <i>Leptolyngbya</i> sp. PCC73110       | 26.1                              | 6.0                               | 2.3                                | 1.3                              |                                     |                              |                                |                             |                                |                                |                              |                                      |                                        |                                   |                            |                           |                                  |                                  |                            |                              |                               |
| <i>L. boryana</i> PCC6306              | 26.1                              | 7.8                               | 3.5                                | 4.2                              | 4.2                                 |                              |                                |                             |                                |                                |                              |                                      |                                        |                                   |                            |                           |                                  |                                  |                            |                              |                               |
| <i>L. boryana</i> BACA0330             | 26.4                              | 5.6                               | 4.0                                | 2.3                              | 3.2                                 | 5.7                          |                                |                             |                                |                                |                              |                                      |                                        |                                   |                            |                           |                                  |                                  |                            |                              |                               |
| <i>Leptolyngbya</i> sp. WS3-2-JR1      | 30.3                              | 17.2                              | 18.3                               | 17.1                             | 16.9                                | 18.0                         | 16.3                           |                             |                                |                                |                              |                                      |                                        |                                   |                            |                           |                                  |                                  |                            |                              |                               |
| <i>Leptolyngbya tildenae</i> YNP77-MA3 | 29.3                              | 13.8                              | 12.7                               | 12.5                             | 12.7                                | 14.1                         | 13.0                           | 17.1                        |                                |                                |                              |                                      |                                        |                                   |                            |                           |                                  |                                  |                            |                              |                               |
| <i>Leptolyngbya</i> sp. WJT66-NPBG17   | 29.6                              | 12.4                              | 12.0                               | 10.4                             | 9.5                                 | 14.2                         | 11.2                           | 16.3                        | 8.8                            |                                |                              |                                      |                                        |                                   |                            |                           |                                  |                                  |                            |                              |                               |
| <i>P. hodgsonii</i> ANT.LPR2           | 28.9                              | 18.7                              | 19.5                               | 18.6                             | 17.5                                | 21.9                         | 18.9                           | 23.2                        | 21.9                           | 17.7                           |                              |                                      |                                        |                                   |                            |                           |                                  |                                  |                            |                              |                               |
| <i>P. hodgsonii</i> ANT.LPR2.3         | 29.8                              | 20.4                              | 21.0                               | 21.5                             | 22.0                                | 18.0                         | 21.5                           | 23.8                        | 23.0                           | 21.8                           | 4.2                          |                                      |                                        |                                   |                            |                           |                                  |                                  |                            |                              |                               |
| <i>P. hodgsonii</i> ANT.L52B.4         | 30.0                              | 20.7                              | 21.2                               | 21.8                             | 22.2                                | 18.2                         | 21.8                           | 24.0                        | 23.2                           | 22.1                           | 4.4                          | 0.2                                  |                                        |                                   |                            |                           |                                  |                                  |                            |                              |                               |
| <i>P. salina</i> FBCC A1477            | 25.7                              | 19.5                              | 18.7                               | 18.8                             | 19.0                                | 16.7                         | 19.9                           | 20.6                        | 15.5                           | 15.2                           | 16.6                         | 14.0                                 | 14.2                                   |                                   |                            |                           |                                  |                                  |                            |                              |                               |
| <i>P. terrestris</i> FBCC A147         | 29.0                              | 19.4                              | 18.1                               | 17.5                             | 18.5                                | 16.8                         | 18.3                           | 17.2                        | 17.4                           | 16.8                           | 23.8                         | 21.9                                 | 22.1                                   | 17.7                              |                            |                           |                                  |                                  |                            |                              |                               |
| <i>P. koreana</i> FBCC A1478           | 28.4                              | 18.3                              | 18.6                               | 17.8                             | 17.8                                | 17.3                         | 18.6                           | 17.5                        | 17.5                           | 17.7                           | 20.7                         | 19.9                                 | 20.1                                   | 15.7                              | 11.2                       |                           |                                  |                                  |                            |                              |                               |
| <i>Plectolyngbya</i> sp. HA4277-MV3    | 29.0                              | 16.1                              | 16.6                               | 16.4                             | 16.1                                | 17.7                         | 17.1                           | 21.6                        | 14.7                           | 14.5                           | 11.2                         | 12.9                                 | 13.1                                   | 13.8                              | 19.3                       | 16.0                      |                                  |                                  |                            |                              |                               |
| <i>L. vaporiphila</i> YNP69B-MA2       | 29.9                              | 14.1                              | 14.0                               | 13.4                             | 13.5                                | 15.0                         | 14.0                           | 17.9                        | 8.6                            | 10.5                           | 21.9                         | 22.8                                 | 23.0                                   | 16.5                              | 16.2                       | 17.1                      | 15.0                             |                                  |                            |                              |                               |
| <i>Leptolyngbya</i> sp. SEV5-3-c28     | 25.2                              | 20.3                              | 21.2                               | 19.5                             | 19.7                                | 19.7                         | 19.8                           | 18.8                        | 18.8                           | 18.1                           | 22.3                         | 23.1                                 | 23.3                                   | 17.9                              | 15.9                       | 14.9                      | 20.1                             | 21.7                             |                            |                              |                               |
| <i>Leptolyngbya</i> sp. SEV4-3-6c      | 27.8                              | 21.1                              | 21.6                               | 21.5                             | 20.8                                | 22.2                         | 21.1                           | 20.3                        | 20.1                           | 17.7                           | 20.7                         | 21.4                                 | 21.6                                   | 21.1                              | 20.9                       | 20.4                      | 19.7                             | 17.7                             | 19.0                       |                              |                               |
| <i>Leptolyngbya</i> sp. SEV4-3-6g      | 28.3                              | 21.5                              | 22.1                               | 22.0                             | 21.3                                | 22.7                         | 21.5                           | 20.7                        | 20.6                           | 18.1                           | 21.1                         | 21.9                                 | 22.1                                   | 21.5                              | 21.4                       | 20.8                      | 20.1                             | 18.1                             | 19.5                       | 0.4                          |                               |
| <i>Leptolyngbya</i> sp. SEV1-1-C2      | 27.6                              | 20.5                              | 20.9                               | 20.5                             | 20.0                                | 21.9                         | 20.5                           | 19.3                        | 18.5                           | 16.7                           | 20.2                         | 21.4                                 | 21.6                                   | 19.6                              | 19.8                       | 19.5                      | 19.1                             | 16.4                             | 18.7                       | 3.8                          | 4.2                           |
